# Supplementary material for: Bone loss and the risk of non-vertebral fractures in women and men: the Tromsø study
Source: Springer Nature journal article supplement (doi:10.1007/s00198-009-1102-z), 2009-11-20

Figure A: Men.

FITTED LOG-LOG SURVIVAL CURVES STRATIFIED ON TERTILES OF BMD CHANGE (%/YEAR)

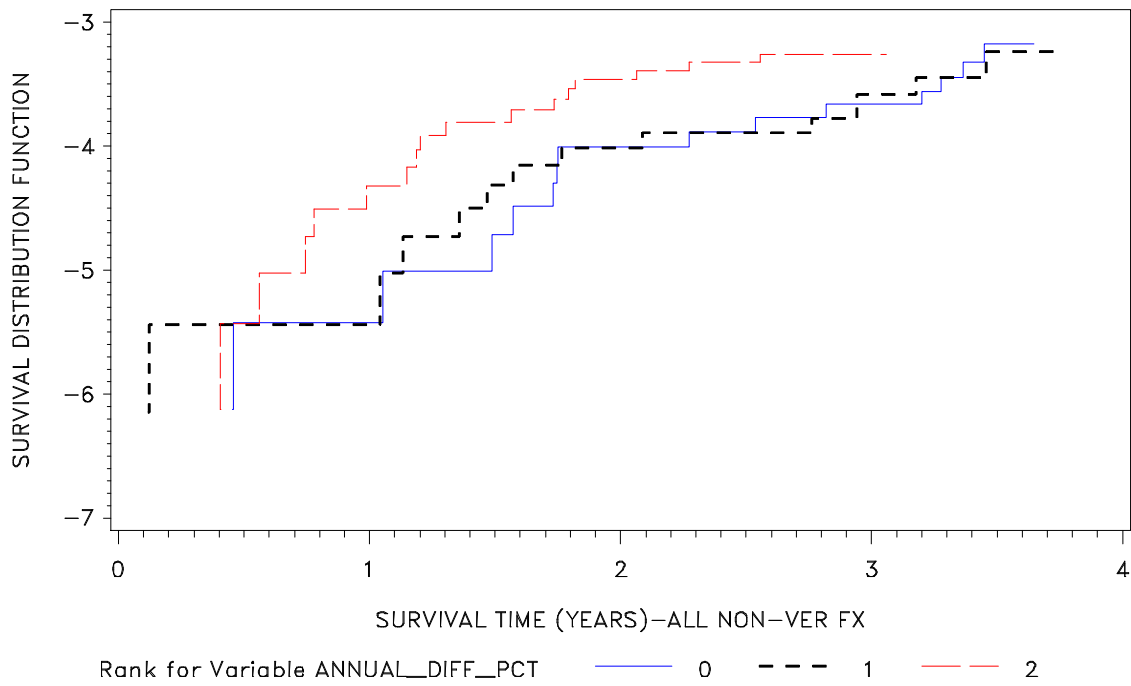

Figure B: Women.

FITTED LOG-LOG SURVIVAL CURVES STRATIFIED ON TERTILES OF BMD CHANGE (%/YEAR)

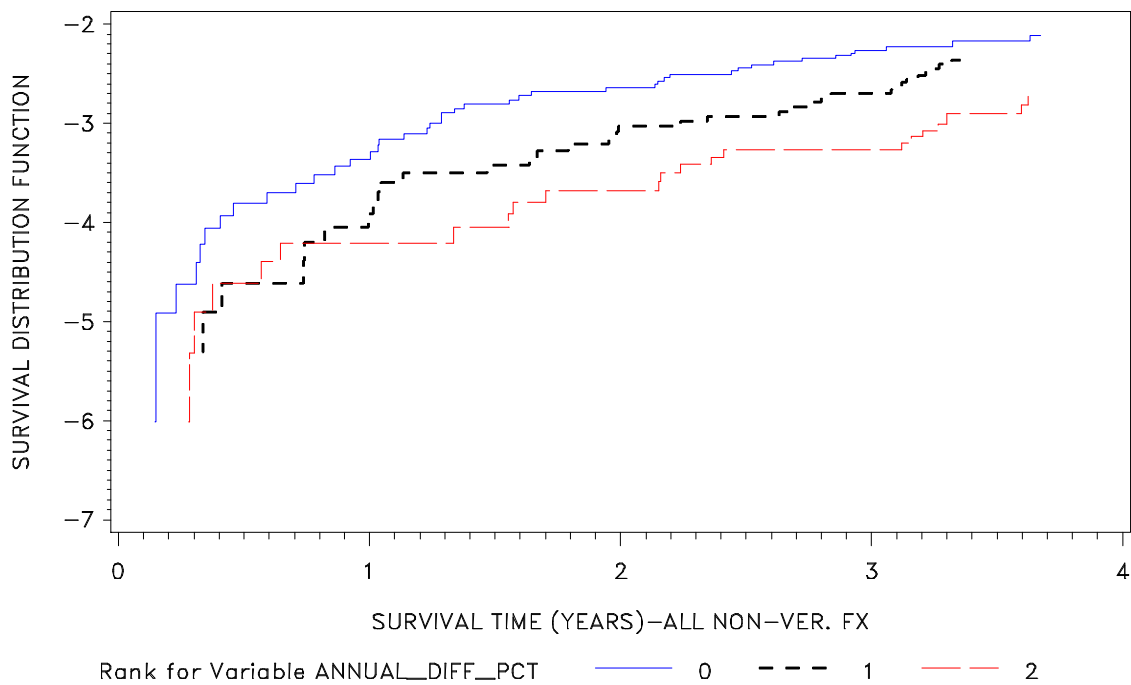

Supplement: 198_2009_1102_MOESM1_ESM.pdf [file 198_2009_1102_MOESM1_ESM.pdf]
